# Genome-scale reconstructions of the mammalian secretory pathway predict metabolic costs and limitations of protein secretion

Jahir M. Gutierrez<sup>1,2</sup>, Amir Feizi<sup>3</sup>, Shangzhong Li<sup>1,2</sup>, Thomas B. Kallehauge<sup>4</sup>, Hooman Hefzi<sup>1,2</sup>, Lise M. Grav<sup>4</sup>, Daniel Ley<sup>4,5</sup>, Deniz Baycin Hizal<sup>6</sup>, Michael J. Betenbaugh<sup>7</sup>, Bjorn Voldborg<sup>4</sup>, Helene Fastrup Kildegaard<sup>4</sup>, Gyun Min Lee<sup>4</sup>, Bernhard O. Palsson<sup>1,2,4,8</sup>, Jens Nielsen<sup>3,4</sup> & Nathan E. Lewis<sup>2,8,+</sup>

<sup>1</sup>Department of Bioengineering, University of California, San Diego, La Jolla, CA 92093, United States

<sup>2</sup>Novo Nordisk Foundation Center for Biosustainability at the University of California, San Diego, School of Medicine, La Jolla, CA 92093, United States

<sup>3</sup>Department of Biology and Biological Engineering, Kemivägen 10, Chalmers University of Technology, SE41296 Gothenburg, Sweden

<sup>4</sup>Novo Nordisk Foundation Center for Biosustainability, Technical University of Denmark, 2800 Kgs. Lyngby, Denmark.

<sup>5</sup>Department of Systems Biology, Technical University of Denmark, Kongens Lyngby, Denmark

<sup>6</sup>Pharmaceutical R&D Department, Turgut Ilaclari A.S., Istanbul, Turkey

<sup>7</sup>Department of Chemical & Biomolecular Engineering, Johns Hopkins University, Baltimore, MD 21218-2686, United States

<sup>8</sup>Department of Pediatrics, University of California, San Diego, School of Medicine, La Jolla, CA 92093, United States.

\* Co-first author

+ Corresponding author

Correspondence and requests for materials should be addressed to N.E.L. (email: [nlewisres@ucsd.edu](mailto:nlewisres@ucsd.edu))

## Abstract

In mammalian cells, >25% of proteins are synthesized and exported through the secretory pathway. The pathway complexity, however, obfuscates its impact on the secretion of different proteins. Unraveling its impact on diverse proteins is particularly important, since the pathway is used for biopharmaceutical production. Here we delineate the core secretory pathway functions and integrate them with genome-scale metabolic models of human, mouse, and Chinese hamster ovary (CHO) cells. The resulting reconstructions RECON2.2s, iMM1685s, and iCHO2048s, enable the computation of the cost and machinery demanded by each secreted protein. We predicted metabolic costs and maximum productivities of biotherapeutic proteins and identified protein features that most significantly impact protein secretion. By integrating additional metabolomic, glycoproteomic and ribosomal profiling data, we further found that CHO cells have adapted to reduce expression and secretion of expensive host cell proteins. Finally, the model successfully predicts the increase in titers after silencing a highly expressed selection marker. This work represents a knowledge-base of the mammalian secretory pathway that serves as a novel tool for systems biotechnology.

## Keywords

Metabolic network, secretory pathway, biotherapeutic production, systems biotechnology

## 40 1. Introduction

41 To interact with their environment, cells produce numerous signaling proteins, hormones,  
42 receptors, and structural proteins. In mammals, these include >3000 secreted proteins (e.g., enzymes,  
43 hormones, antibodies, extracellular matrix proteins, etc.) and >5500 membrane proteins<sup>1</sup>, most of which  
44 are synthesized and processed in the secretory pathway. The secretory pathway is a complex series of  
45 processes predominantly in the endoplasmic reticulum (ER), Golgi apparatus, and other compartments  
46 of the endomembrane system. In these compartments, the synthesis of the thousands of membrane  
47 and secreted proteins is facilitated by hundreds of other proteins that make up the secretory pathway  
48 machinery. These are used to translate, fold, post-translationally modify, test for quality, sort and  
49 translocate the secreted proteins.

50 The secretory pathway is particularly important in biotechnology and the biopharmaceutical  
51 industry, since most therapeutic proteins are secreted. Mammalian cell lines such as HEK293, PerC6, and  
52 Chinese hamster ovary (CHO) cells are used extensively to ensure that a secreted biotherapeutic is  
53 properly folded and contains the necessary post-translational modifications (PTMs)<sup>2</sup>. For any given  
54 biotherapeutic, different machinery in the secretory pathway may be needed, and each step can exert a  
55 non-negligible metabolic demand on the cells. The complexity of this pathway, however, makes it  
56 unclear how the biosynthetic cost and cellular needs vary for different secreted proteins, each of which  
57 exerts different demands for cellular resources. Therefore, a detailed understanding of the biosynthetic  
58 costs of the secretory pathway could guide efforts to engineer host cells and bioprocesses for any  
59 desired product. The energetic and material demands of the mammalian secretory pathway can be  
60 accounted for by substantially extending the scope of metabolic models. Indeed, recent studies have  
61 incorporated portions of the secretory pathway in metabolic models of yeast<sup>3-5</sup>.

62 Here we present the first genome-scale reconstructions of mammalian metabolism and protein  
63 secretion. Specifically, we constructed these for human, mouse, and CHO cells, called RECON2.2s,  
64 iMM1685s, and iCHO2048s, respectively. Given its dominant role in biotherapeutic production, we focus  
65 here on the biosynthetic capabilities of CHO cells, while providing models as a resource. We first  
66 demonstrate that product-specific secretory pathway models can be built to estimate CHO cell growth  
67 rates given the specific productivity of the recombinant product as a constraint. Second, we identify the  
68 features of secreted proteins that have the highest impact on protein cost and productivity rates. Third,  
69 we use our model to identify proteins that compete for cell resources, thereby presenting targets for  
70 cell engineering. Finally, we derive an expression for computing the energetic cost of synthesizing and

71 secreting a product in terms of molecules of ATP equivalents per protein molecule. We use this  
72 expression and analyze how the energetic burden of protein secretion has led to an overall suppression  
73 of more expensive secreted host cell proteins in CHO cells. Through this study we demonstrate that a  
74 systems-view of the secretory pathway now enables the analysis of many biomolecular mechanisms  
75 controlling the efficacy and cost of protein expression in mammalian cells. We envision our models as  
76 valuable tools for the study of normal physiological processes and engineering cell bioprocesses in  
77 biotechnology. Our models, Jupyter notebooks, and data are available at  
78 <https://github.com/LewisLabUCSD>.

79

## 80 **2. Material and Methods**

### 81 **2.1 Reconstruction of the mammalian secretory pathway**

82 A list of proteins and enzymes in the mammalian secretory pathway was compiled from literature  
83 curation, UniProt, NCBI Gene, NCBI Protein and CHOgenome.org (see Supp. File 1). To facilitate the  
84 reconstruction process, the secretory pathway was divided into twelve subsystems or functional  
85 modules (Fig. 1) to sort the components according to their function. These subsystems correspond to  
86 the major steps required to process and secrete a protein. The components from a prior yeast secretory  
87 pathway reconstruction<sup>3</sup> were used as a starting reference. To build species-specific models, orthologs  
88 for human, mouse and the Chinese hamster were identified and used, while yeast components and  
89 subsystems that are not present in the mammalian secretory pathway were removed. Additional  
90 subsystems were added when unique to higher eukaryotes, such as the calnexin-calreticulin cycle in the  
91 ER<sup>6</sup>. These were constructed *de novo* and added to the reconstruction. The databases and literature  
92 were then consulted to identify the remaining components involved in each subsystem of the  
93 mammalian secretory pathway. Since most components in the mammalian secretory pathway have  
94 been identified in mouse and human, BLAST was utilized to identify the corresponding Chinese hamster  
95 orthologs by setting human as the reference organism and a cutoff of 60% of sequence identity. See  
96 Supp. File 4 for a concise overview of the mammalian secretory pathway and its comparison with the  
97 yeast secretory pathway.

98

### 99 **2.2 Protein Specific Information Matrix (PSIM)**

100 The PSIM (Supp. File 2) contains the necessary information to construct a protein-specific secretory  
101 model from the template reactions in our reconstruction. The columns in the PSIM are: presence of a

102 signal peptide (SP), number of disulfide bonds (DSB), presence of Glycosylphosphatidylinositol (GPI)  
103 anchors, number of N-linked (NG) and O-linked (OG) glycans, number of transmembrane domains  
104 (TMD), subcellular location, protein length, and molecular weight. For most proteins, the information in  
105 the PSIM was obtained from the Uniprot database. When necessary, computational tools were used to  
106 predict signal peptides (PrediSi<sup>7</sup>) and GPI anchors (GPI-SOM<sup>8</sup>). Finally, additional information on the  
107 number of O-linked glycosylation sites of certain proteins were obtained from experimental data in  
108 previous studies<sup>9,10</sup>. The PSIMs of the CHO and human secretomes are a subset of the full PSIM and  
109 contains only the proteins with a signal peptide (predicted or confirmed in Uniprot). The distribution of  
110 all PTMs across the human, mouse and CHO proteomes can be found in Supp. Notebook 5.

111

### 112 **2.3 Detection of N-linked glycosylation sites via mass spectrometry**

113 The number of N-linked glycosylation sites in the PSIM was determined computationally and  
114 experimentally as follows. CHO-K1 cells (ATCC) were lysed, denatured, reduced, alkylated and digested  
115 by trypsin. Desalted peptides were incubated with 10 mM sodium periodate in dark for 1 hour before  
116 coupling to 50  $\mu$ L of (50% slurry) hydrazide resins. After incubation overnight, non-glycosylated peptides  
117 were washed with 1.5 M NaCl and water. The N-glycosylated peptides were released with PNGaseF at  
118 37 °C and desalted by using a C18 SepPak column. Strong cation exchange (SCX) chromatography was  
119 used to separate the sample into 8 fractions. Each fraction was analyzed on an LTQ-Orbitrap Velos  
120 (Thermo Electron, Bremen, Germany) mass spectrometer. During the mass spectrometry data analysis,  
121 carbamidomethylation was set as a fixed modification while oxidation, pyroglutamine and deamidation  
122 were variable modifications.

123

### 124 **2.4 Construction of secretory models and constraint-based analysis**

125 We wrote Jupyter Notebooks in both Python and MATLAB (see Supp. Jupyter Notebooks 1 and 2) that  
126 take a row from the PSIM as input to produce an expanded iCHO2048s metabolic model with the  
127 product-specific secretory pathway of the corresponding protein. Flux balance analysis (FBA<sup>11</sup>) and all  
128 other constraint-based analyses were done using the COBRA toolbox<sup>12</sup> in MATLAB R2014a and the  
129 Gurobi solver version 6.0.0. The analyses in Figs. 2, 3, and 4 were done using the constraints in Supp. File  
130 3. For the iCHO2048s models secreting human proteins, we set the same constraints in all models and  
131 computed the theoretical maximum productivity ( $\max_{qp}$ ) while maintaining a growth rate (in units of  
132 1/h) of 0.01. Finally, since the exact glycoprofiles of most proteins in CHO are unknown and some even

133 change over time in culture<sup>13</sup>, we simplified our models by only adding the core N-linked and O-linked  
134 glycans to the secreted proteins.

135

## 136 **2.5 Batch cultivation**

137 Two isogenic CHO-S cell lines adapted to grow in suspension, one producing Enbrel (Etanercept) and the  
138 other producing human plasma protease C1 inhibitor (SERPING1), were seeded at  $3 \times 10^5$  cells/mL in 60  
139 mL CD-CHO medium (Thermo Fisher Scientific, USA) supplemented with 8 mM L-Glutamine and 1  $\mu$ L/mL  
140 anti-clumping agent, in 250 mL Erlenmeyer shake flasks. Cells were incubated in a humidified incubator  
141 at 37°C, 5% CO<sub>2</sub> at 120 rpm. Viable cell density and viability were monitored every 24 hours for 7 days  
142 using the NucleoCounter NC-200 Cell Counter (ChemoMetec). Daily samples of spent media were taken  
143 for extracellular metabolite concentration and titer measurements by drawing 0.8 mL from each culture,  
144 centrifuging it at 1000 g for 10 minutes and collecting the supernatant and discarding the cell pellet.

145

## 146 **2.6 Titer determination**

147 To quantify Enbrel/SERPING1, biolayer interferometry was performed using an Octet RED96 (Pall  
148 Corporation, Menlo Park, CA). ProA biosensors (Fortebio 18-5013) were hydrated in PBS and  
149 preconditioned in 10 mM glycine pH 1.7. A calibration curve was prepared using Enbrel (Pfizer) or  
150 SERPING1 at 200, 100, 50, 25, 12.5, 6.25, 3.13, 1.56, 0.78  $\mu$ g/ml. Culture spent media samples were  
151 collected after centrifugation and association was performed for 120 s with a shaking speed of 200 rpm  
152 at 30 °C. Octet System Data Analysis 7.1 software was used to calculate binding rates and absolute  
153 protein concentrations.

154

## 155 **2.7 Extracellular metabolite concentration measurements**

156 The concentrations of glucose, lactate, ammonium (NH<sub>4</sub><sup>+</sup>), and glutamine in spent media were  
157 measured using the BioProfile 400 (Nova Biomedical). Amino acid concentrations were determined via  
158 High Performance Liquid Chromatography using the Dionex Ultimate 3000 autosampler at a flow rate of  
159 1mL/min. Briefly, samples were diluted 10 times using 20  $\mu$ L of sample, 80  $\mu$ L MiliQ water, and 100  $\mu$ L  
160 of an internal amino acid standard. Derivatized amino acids were monitored using a fluorescence  
161 detector. OPA-derivatized amino acids were detected at 340ex and 450em nm and FMOC-derivatized  
162 amino acids at 266ex and 305em nm. Quantifications were based on standard curves derived from  
163 dilutions of a mixed amino acid standard (250  $\mu$ g/mL). The upper and lower limits of quantification were  
164 100 and 0.5  $\mu$ g/mL, respectively.

165  
166  
167  
168  
169  
170  
171  
172  
173  
174  
175  
176  
177  
178  
179  
180  
181  
182  
183  
184  
185  
186  
187  
188  
189  
190  
191  
192  
193  
194  
195

## 2.8 Estimation of the energetic cost of secreting a protein as the number of ATP equivalent molecules

We estimated the energetic cost of synthesizing and secreting all 5,641 endogenous CHO cell proteins. These proteins were chosen for containing a signal peptide in their sequence and/or for being localized in the cell membrane (according to the UniProt database). The energetic cost (in units of number of ATP equivalents) of secreting each protein (length  $L$ ) was computed using the following formulas and assumptions:

1. **Energy cost of translation.** For each protein molecule produced,  $2L$  ATP molecules are cleaved to AMP during charging of the tRNA with a specific amino acid;  $1$  GTP molecule is consumed during initiation and  $1$  GTP molecule for termination;  $L - 1$  GTP molecules are required for the formation of  $L-1$  peptide bonds;  $L - 1$  GTP molecules are necessary for  $L-1$  ribosomal translocation steps. Thus, the total cost of translation (assuming no proofreading) is  $4L$ .
2. **Average cost of signal peptide degradation.** On average, signal peptides have a length of 22 amino acids. Thus, the average cost of degrading all peptide bonds in the signal peptide is  $22$ . This average cost was assigned to all proteins analyzed.
3. **Energetic cost of translocation across the ER membrane.** During activation of the translocon,  $2$  cytosolic GTP molecules are hydrolyzed. From there, a GTP molecule bound to the folding-assisting chaperone BiP is hydrolyzed to GDP for every 40 amino acids that pass through the translocon pore<sup>14</sup>. Thus, the cost of translocation is  $L/40 + 2$ .
4. **Energetic cost of vesicular transport and secretion.** We used published data<sup>15-17</sup> (see Supp. File 1) to compute stoichiometric coefficients for reactions involving vesicular transport. That is, the number of GTP molecules bound to RAB and coat proteins in each type of vesicle (COPII and secretory vesicles). We found that a total of 192 and 44 GTPs must be hydrolyzed to transport one COPII or secretory (i.e. clathrin coated) vesicle from the origin membrane to the target membrane, respectively. Since vesicles do not transport a single protein molecule at a time, we estimated the number of secreted protein molecules that would fit inside a spherical vesicle (see estimated and assumed diameters in Supp. File 1). For that, we assumed that the secreted protein is globular and has a volume  $V_p$  (nm<sup>3</sup>) that is directly proportional to its molecular weight  $MW$ <sup>18</sup>:

$$V_p = MW \times 0.00121$$

196 Finally, we assumed that only 70 percent of the vesicular volume can be occupied by the target  
197 protein. Thus, the cost of vesicular transport via COPII vesicles with Volume  $V_{COPII}$  is:

$$198 \quad 192 \text{ GTPs} \div (V_{COPII} \times 0.7 \div V)$$

199 Similarly, the cost of vesicular secretion is:

$$200 \quad 44 \text{ GTPs} \div (V_{Secretory} \times 0.7 \div V)$$

201

## 202 **2.9 Constraints used in models and Pareto optimality frontiers**

203 All models were constrained using different sets of experimental uptake rates, which can be found in  
204 Supp. File 3. To construct Pareto optimality frontiers, we used the robustAnalysis function from the  
205 COBRA Toolbox in Matlab 2015b using biomass as the control and secretion of the recombinant protein  
206 as the objective reactions, respectively.

207

## 208 **2.10 Analysis of gene expression versus protein cost**

209 Ribosome-profiling data<sup>19</sup> were used to quantify the ribosomal occupancy of each transcript in CHO  
210 cells. A cutoff of 1 RPKM was used to remove genes with low expression (10,045 genes removed from  
211 day 3 analysis and 10,411 from day 6 analysis). We used Spearman correlation to assess the variation of  
212 expression levels with respect to protein ATP cost.

213

## 214 **2.11 CHO-DG44 model and prediction of neoR knock-out effect on specific productivity**

215 Ribosome-profiling data, specific productivity, product sequence, and growth rates of an IgG-producing  
216 CHO-DG44 cell line were obtained previously<sup>19</sup>. From the same cultures, we obtained further cell dry  
217 weight and metabolomic data from spent culture medium for this study. The mCADRE algorithm<sup>20,21</sup> was  
218 used to construct a DG44 cell line-specific iCHO2048s model. The specific productivity and the RPKM  
219 values of the secreted IgG were used to estimate the translation rate for the neoR selection marker  
220 gene. We assumed that the flux (in units of mmol/gDW/h) through the neoR translation reaction ( $v_{neoR}$ )  
221 should be proportional to that of the IgG translation rate ( $v_{IgG}$ , calculated from the measured specific  
222 productivity) and related to their expression ratios (i.e. the RPKM values of their genes in the ribosome-  
223 profiling data).

$$224 \quad v_{neoR} = \frac{RPKM_{neoR}}{2(RPKM_{light} + RPKM_{heavy})} v_{IgG}$$



225 Finally, a reaction of neoR peptide translation (which is expressed in cytosol and is not processed in the  
226 secretory pathway) was added to construct a neoR-specific iCHO2048s model. Uptake and secretion  
227 rates of relevant metabolites on days 3 and 6 of cell culture were used to constrain our model. Because  
228 recombinant proteins represent 20% of total cell protein<sup>22</sup>, we scaled the coefficients of all 20 amino  
229 acids in the model's biomass reaction accordingly (i.e. each coefficient was multiplied by 0.8). We then  
230 used FBA to predict the specific productivity of IgG with or without neoR.

231

## 232 **2.12 Cell dry weight measurements**

233 For cell dry weight measurements, 6 tubes containing 2 mL of culture samples of known viable cell  
234 density and viability were freeze dried, weighed, washed in PBS, and weighed again. The difference in  
235 weight was used to calculate the mass per cell. The procedure resulted in an average cell dry weight of  
236 456 pg per cell. As a simplification, we assumed that cell dry weight does not significantly differ from  
237 this average measured value during culture and thus was used when computing flux distributions in all  
238 simulations.

239

## 240 **2.13 Calculation of amino acid uptake, growth rates and specific productivity from** 241 **experimental data**

242 Supp. File 3 contains the uptake and secretion rates used to constrain the iCHO2048s models<sup>19,22,23</sup>.  
243 When rates were not explicitly stated in the studies we consulted, we used a method we developed  
244 previously<sup>24</sup>. Briefly, appropriate viable cell density, titer, and metabolite concentration plots were  
245 digitized using WebPlot Digitizer software and we computed the corresponding rates as follows:

- 246 • Growth rate (in units of inverse hours):

$$247 \quad \mu = \frac{1}{VCD} \frac{d}{dt} VCD$$

248 Where VCD is the viable cell density (in units of cells per milliliter)

- 249 • Specific productivity (in units of picograms per cell per hour):

$$250 \quad q_p = \frac{1}{VCD} \frac{d}{dt} Titer$$

- 251 • Consumption or production rate  $v_x$  of metabolite x (in units of millimoles per gram dry weight  
252 per hour):

$$253 \quad v_x = \frac{1}{VCD} \frac{d}{dt} [x]$$

254



## 255 **3. RESULTS**

### 256 **3.1 *In silico* reconstruction of the mammalian protein secretion pathway**

257 We mapped out the core processes involved in the synthesis of secreted and membrane proteins in  
258 mammalian cells (i.e. human, mouse, and Chinese hamster). This included 261 components (gene  
259 products) in CHO cells and 271 components in both human and mouse. The components are involved in  
260 secretory reactions across 12 subsystems (i.e., functional modules of the secretory pathway; Fig. 1A).  
261 These components represent the core secretory machinery needed in the transition of a target protein  
262 from its immature state in the cytosol (i.e., right after translation) to its final form (i.e., when it contains  
263 all post-translational modifications and is secreted to the extracellular space). Each component in the  
264 reconstruction either catalyzes a chemical modification on the target protein (e.g., N-linked  
265 glycosylation inside ER lumen/Golgi) or participates in a multi-protein complex that promotes protein  
266 folding and/or transport. This distinction between catalytic enzymes and complex-forming components  
267 is important for modeling purposes as a catalytic component consumes or produces metabolites that  
268 are directly connected to the metabolic network (e.g., ATP, sugar nucleotides). Because all components  
269 of the core secretory pathway were conserved across human, mouse and hamster (Fig. 1B), we  
270 generated species-specific reconstructions and used them to expand the respective genome-scale  
271 metabolic network reconstructions (Recon 2.2<sup>25</sup>, IMM1415<sup>26</sup>, iCHO1766<sup>23</sup>) and called these metabolic-  
272 secretory reconstructions Recon 2.2s, IMM1685s, and iCHO2048s, respectively. A detailed list of the  
273 components, reactions and the associated genes can be found in Supp. File 1.

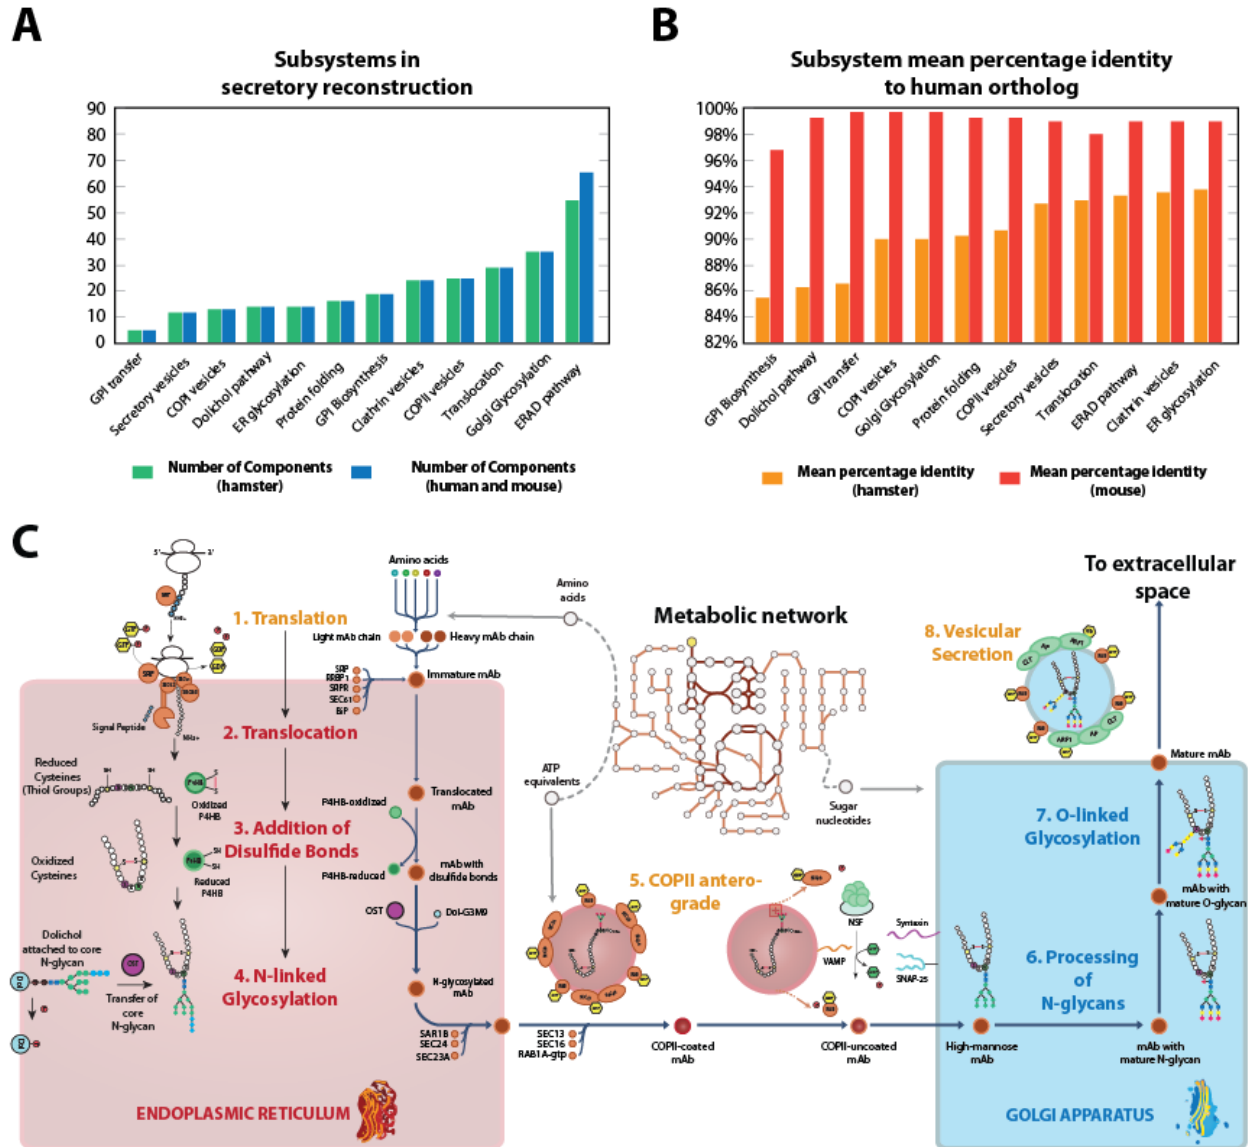

274

275 **Figure 1 - Components in the reconstruction of secretory pathway in mammalian cells. (A)** The  
 276 reconstruction comprises 261 proteins in CHO cells and 271 proteins in human and mouse that are  
 277 distributed across 12 subsystems. The different component numbers arise from the fact that the  
 278 Chinese hamster proteome annotation only contains one alpha and one beta proteasome subunits,  
 279 whereas the human and mouse contain 12 subunits of different subtypes. The detailed description of all  
 280 components can be found in Supp. File 1. **(B)** High similarities were seen for proteins in CHO and human,  
 281 with a high mean percentage identity in each subsystem (calculated with the sequence alignment tool  
 282 BLAST). **(C)** Simplified schematic of reactions and subsystems involved in the secretion of a monoclonal  
 283 antibody (mAb). A total of eight subsystems are necessary to translate, fold, transport, glycosylate, and  
 284 secrete a mAb. The color of the subsystem names indicates if the reactions occur in the cytoplasm

285 (yellow), the ER lumen (red) or the Golgi apparatus (blue). GPI = Glycosylphosphatidylinositol, ER =  
286 Endoplasmic Reticulum, ERAD = ER associated degradation.

287

### 288 3.2 iCHO2048s predicts measured growth rates for recombinant-protein-producing cells

289 We first validated the accuracy of iCHO2048s predictions using published growth and specific  
290 productivity rates of IgG-producing CHO cell lines from two independent studies<sup>19,27</sup>. For this,

291 we built an IgG-secreting iCHO2048s model using the information in the PSIM matrix for the  
292 therapeutic monoclonal antibody (mAb) Rituximab. We then constrained the model's Rituximab-  
293 specific secretory pathway with the reported productivity value in each study and used FBA to

294 predict growth (Fig. 2A). Later, to assess the ability of iCHO2048s to predict growth rates in

295 cases when CHO cells are producing non-antibody proteins, we collected data from two batch  
296 culture experiments using Enbrel- and SERPING1-producing isogenic CHO cell lines. We

297 constructed two iCHO2048s models for each case and predicted growth rates on days 1 (early  
298 exponential growth phase) through 5 (late exponential growth phase) of culture while

299 constraining the protein secretion rate to the measured specific productivity value (Fig. 2B-C).

300 The model's predictions agreed well with the reported/measured values. There were cases

301 where iCHO2048s predicted a much higher growth rate than what was measured in the first

302 days of batch culture (Fig. 2B-C). Since FBA computes theoretical maximum growth rates given

303 a set of constraints, these over-prediction cases point at situations where CHO cells do not

304 direct resources towards biomass production (during very early stages of culture), a discrepancy

305 that is attenuated in later stages of culture (days 4-5 in Fig. 2B-C). In conclusion, these results

306 confirm the ability of protein-specific reconstructions to capture the specific energetic

307 requirements that each recombinant product imposes on CHO cell metabolism.

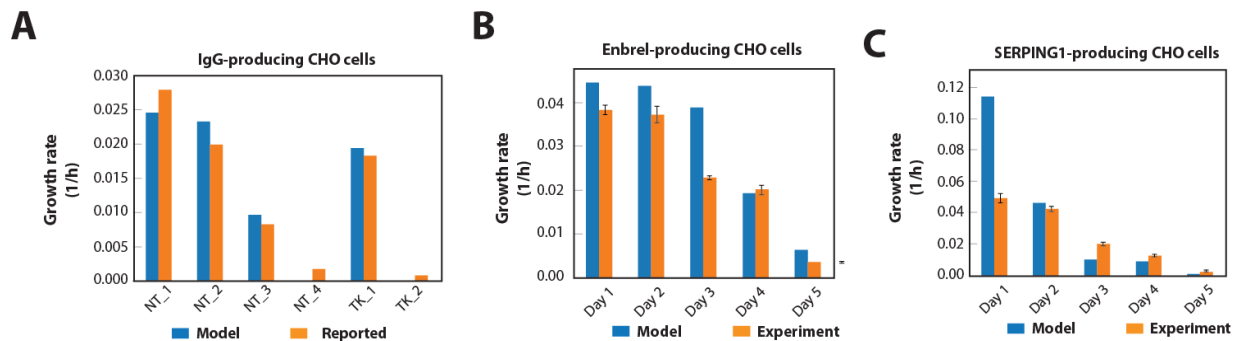

308

309 **Figure 2 – Recombinant-protein-producing models of iCHO2048s predict measured growth rates. (A)**  
310 Growth rates were computed using an IgG-specific iCHO2048s model and compared to experimentally-  
311 measured growth rates from six datasets from two previous studies using IgG-producing cell lines. NT  
312 and TK specify the initials of the first author of the two studies (Neil Templeton, Thomas Kallehauge). **(B-**  
313 **C)** Additional growth, productivity, and metabolomic data were obtained from Enbrel and SERPING1-  
314 producing CHO cells, and models were constructed. **(B)** The model-predicted growth rates were  
315 consistent with experimental growth rates of Enbrel-producing CHO cells and **(C)** SERPING1-producing  
316 CHO cells at almost all time points. Error bars in B and C represent the standard deviation of three  
317 biological replicates. In all cases, the iCHO2048s models were constrained to produce the recombinant  
318 protein at the measured specific productivity rate. The values used to constrain each of the iCHO2048s  
319 models are reported in Supp. File 3.

320

### 321 **3.3 Protein composition and complexity significantly impact model-predicted productivity**

322 To produce a specific product, CHO cells may utilize different modules of the secretory pathway based  
323 on the protein attributes and post-translational modifications (PTMs). For example, the synthesis of a  
324 mAb requires the use of multiple processes and consumes several different metabolites, such as amino  
325 acids for protein translation, redox equivalents for forming disulfide bonds, ATP equivalents for vesicular  
326 transport, and sugar nucleotides for protein glycosylation (Fig. 1C). Therefore, we set out to generate  
327 eight product-specific secretory pathway models for biotherapeutics commonly produced in CHO cells  
328 (Fig. 3A): bone morphogenetic proteins 2 and 7 (BMP2, BMP7), erythropoietin (EPO), Etanercept, factor  
329 VIII (F8), interferon beta 1a (IFNB1), Rituximab, and tissue plasminogen activator (tPA). The resulting  
330 iCHO2048s models were used to compute Pareto optimality frontiers between maximum cell growth ( $\mu$ )  
331 and specific productivity ( $q_p$ ) assuming all eight CHO cells grow under the same conditions. That is, all  
332 eight models were given the same measured glucose and amino acid uptake rates<sup>23</sup> as model constraints  
333 (see Supp. File 3)

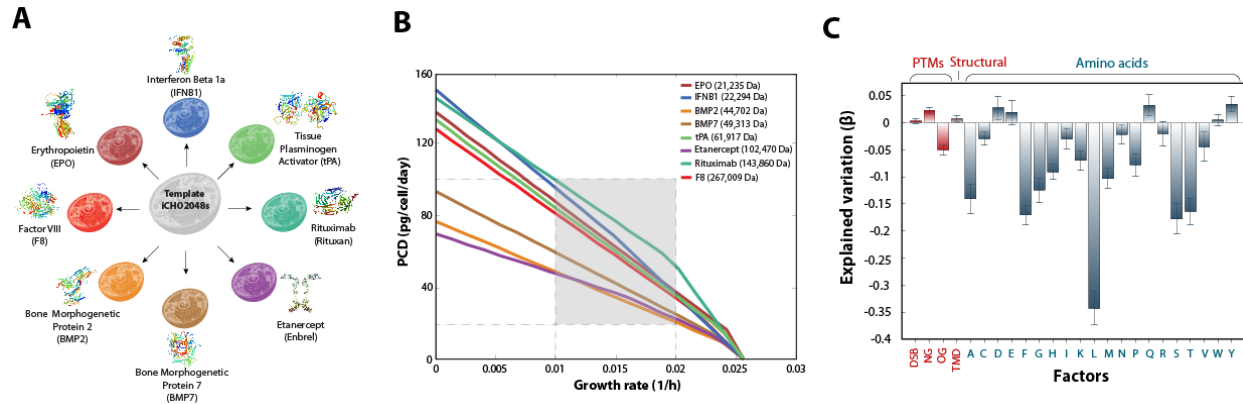

334  
 335 **Figure 3 - Construction of product-specific iCHO2048s models.** (A) Eight product-specific iCHO2048s  
 336 models were constructed for biotherapeutics commonly produced in CHO cells. (B) Pareto optimality  
 337 frontiers of growth/productivity ( $\mu/q_p$ ) trade-off curves were computed for the eight iCHO2048s models  
 338 using the same constraints and experimental data from Supp. File 3. The shaded region corresponds to  
 339 range of maximum productivity at commonly observed growth rates in CHO cell cultures. The molecular  
 340 weight (in Daltons) of each biotherapeutic is shown in the legend. (C) All protein features (PTMs,  
 341 transmembrane domains, and amino acid compositions) were analyzed to quantify their contribution to  
 342 the explained variation of specific productivity.

343  
 344 We computed the tradeoff between growth ( $\mu$ ; inverse hours or 1/h) and specific productivity ( $q_p$ ; pg  
 345 protein produced per cell per day or PCD) as a Pareto optimal “ $\mu/q_p$  curve” for each protein (Fig. 2B).  
 346 This curve defines the frontier of maximum specific productivity and maximum growth rates under the  
 347 assumption that CHO cells can utilize all available resources towards production of biomass and  
 348 recombinant protein only. The hinges in some of the  $\mu/q_p$  curves are indicative of a transition between  
 349 regions in the  $\mu/q_p$  that are limited by distinct protein requirements (e.g., amino acids).

350  
 351 An analysis of the  $\mu/q_p$  curves for the eight biotherapeutics demonstrates that under the measured  
 352 growth conditions, maximum productivities vary from 20-100 PCD at common growth rates (Fig. 2B,  
 353 shaded region) to 70-150 PCD for senescent CHO cells. Neither the molecular weight (MW) nor product  
 354 length can explain the 2-fold range differences in maximum productivity for different proteins. For  
 355 example, the  $\mu/q_p$  curves show tPA (MW = 61,917 Da) can express at higher PCD than BMP2 (MW =  
 356 44,702 Da) despite being larger, because the N-glycans in BMP2 reduce productivity due to the higher  
 357 cost of synthesizing core N-glycans (see Table 1), consistent with previous observations in yeast<sup>5</sup>.  
 358 Furthermore, the degree and directionality of these effects will depend on the nutrient uptake rates,

359 highlighting the need in CHO bioprocessing to tailor culture media in a host cell and product-specific  
 360 manner. Thus, while intuitively larger proteins would be expected to exert more bioenergetic cost on  
 361 protein secretion, we find that specific compositional attributes of both the recombinant protein and  
 362 the culture media significantly impact biosynthetic capacity.  
 363

**Table 1. Protein specific information matrix of biotherapeutics secreted in eight iCHO2048s models**

| Protein Name | Total number of amino acids in biotherapeutic | Molecular Weight [Da] | Total number of disulfide bonds in mature protein | Total number of N-glycans in mature protein | Total number of O-glycans in mature protein | Estimated secretory cost [ATP equivalents] |
|--------------|-----------------------------------------------|-----------------------|---------------------------------------------------|---------------------------------------------|---------------------------------------------|--------------------------------------------|
| IFNB1        | 187                                           | 22294                 | 1                                                 | 1                                           | 0                                           | 777                                        |
| EPO          | 193                                           | 21037                 | 2                                                 | 3                                           | 1                                           | 801                                        |
| BMP2         | 396                                           | 44702                 | 4                                                 | 5                                           | 0                                           | 1618                                       |
| BMP7         | 431                                           | 49313                 | 4                                                 | 4                                           | 0                                           | 1759                                       |
| tPA          | 562                                           | 61917                 | 17                                                | 3                                           | 1                                           | 2286                                       |
| Etanercept** | 934                                           | 102470                | 7                                                 | 6                                           | 26                                          | 3784                                       |
| Rituximab*   | 1328                                          | 143860                | 17                                                | 2                                           | 0                                           | 5370                                       |
| F8           | 2351                                          | 267009                | 8                                                 | 22                                          | 0                                           | 9488                                       |

\* = Rituximab is a tetramer (2 light and 2 heavy chains)

\*\* = Etanercept is a dimer

364

365

### 366 3.4 iCHO2048s accurately predicts protein productivity increase following gene knock-down

367 Kallehauge et al.<sup>19</sup> demonstrated that a CHO-DG44 cell line producing an antiviral mAb<sup>28</sup> also expressed  
 368 high levels of the neoR selection-marker gene (Fig. 4A-B). Upon neoR knockdown, the titer and  
 369 maximum viable cell densities of the CHO-DG44 cell line were increased. To test if iCHO2048s could  
 370 replicate these results, we constructed a model for the Kallehauge et al. DG44 cell line and measured  
 371 exometabolomics, and dry cell weight to parameterize the model. Since expression of neoR uses  
 372 resources that could be used for antibody production, we predicted how much additional antibody  
 373 could be synthesized with the elimination of the neoR gene. We simulated antibody production  
 374 following a complete knockout of neoR (see Table 2 and Fig. 4B) and predicted that the deletion of neoR  
 375 could increase specific productivity by up to 4% and 29% on days 3 (early exponential phase) and 6 (late  
 376 phase) of culture, respectively (Fig. 4C). This was consistent with the experimentally observed values of  
 377 2% and 14%. We then computed the  $\mu/q_p$  curves for both the control and the neoR *in silico* knockout  
 378 conditions on day 6. We found that the length of the  $\mu/q_p$  curve (i.e. the size of the set of Pareto optimal

379 flux distributions, here denoted by delta ( $\Delta$ ) increased by 18% percent when neoR production is  
 380 eliminated (Fig. 4D). Thus, iCHO2048s can quantify how much non-essential gene knockouts can boost  
 381 growth and productivity in CHO cells by freeing energetic and secretory resources. In fact, the ribosome-  
 382 profiling data from Kallehauge et al. revealed that only 30 secretory proteins in CHO cells account for  
 383 more than 50% of the ribosomal load directed towards translation of protein bearing a signal peptide  
 384 (Fig. 4E). An analysis of other potential host cell gene knockouts using the method proposed here can be  
 385 found in Supp. File 5.  
 386

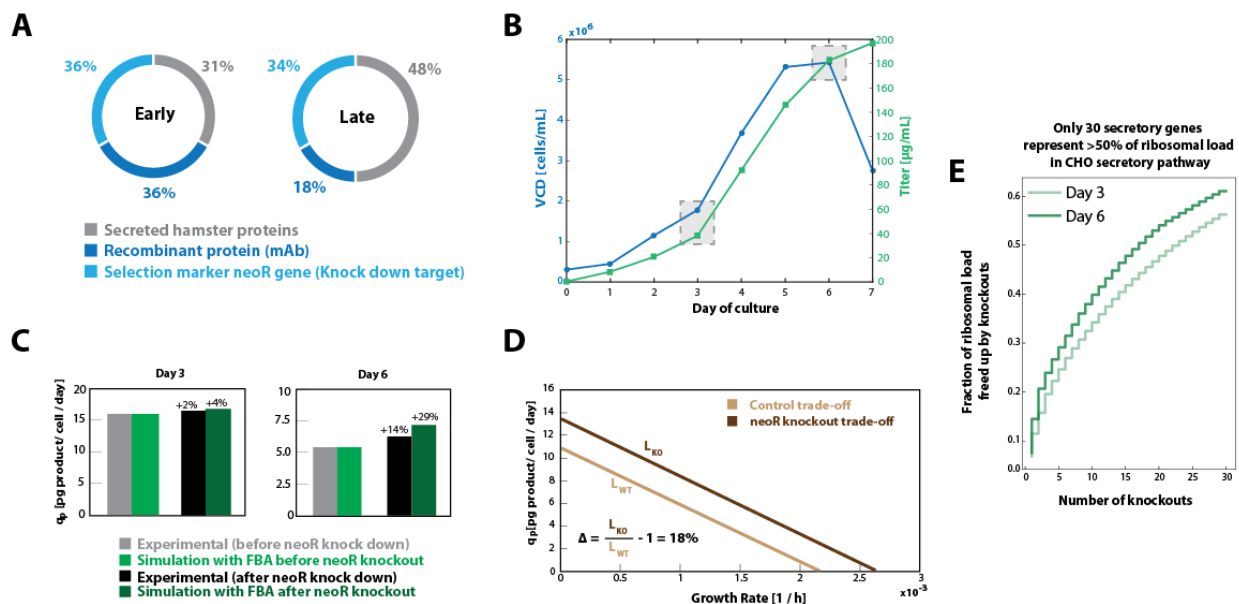

387  
 388 **Figure 4 - iCHO2048s recapitulates experimental results of neoR knock-down *in silico*.** (A) Ribosome  
 389 occupancy was measured with ribosomal profiling during early (left) and late (right) exponential growth  
 390 phases<sup>19</sup>. (B) Time profiles are shown for viable cell density (VCD) and titer in experimental culture.  
 391 Shaded boxes indicate the time points corresponding to early (day 3) and late (day 6) growth phases. (C)  
 392 Flux balance analysis was used to predict specific productivity ( $q_p$ ) with the iCHO2048s model before and  
 393 after *in silico* knockout of neoR gene. (D) Growth/productivity ( $\mu/q_p$ ) trade-offs were predicted by  
 394 iCHO2048s and demonstrated a potential 18% increase after the neoR *in silico* knockout. The formula  
 395 for calculating the trade-off improvement ( $\Delta$ ) is shown in the plot.  $L_{WT}$  = length of  $\mu/q_p$  curve before  
 396 knockout,  $L_{KO}$  = length of  $\mu/q_p$  curve after knockout. (E) Ribosomal occupancy for all mRNA sequences  
 397 bearing a signal peptide sequence were analyzed from the Kallehauge et al. study, and demonstrated  
 398 that the top 30 secreted proteins accounted >50% of the ribosomal occupancy of secreted proteins.  
 399



**Table 2 - Experimental data from Kallenhauge et al. used for testing predictive capabilities of iCHO2048s**

| Experimental value description                     | Day 3 (early exponential growth phase) | Day 6 (late growth phase) |
|----------------------------------------------------|----------------------------------------|---------------------------|
| Growth Rate [1/day]                                | 0.44                                   | 0.02                      |
| *Specific Productivity [Picograms of IgG/cell/day] | 16                                     | 5.5                       |
| **Total IgG ribosomal footprint [RPKM]             | 40258                                  | 13356                     |
| Total neoR ribosomal footprint [RPKM]              | 36952                                  | 25679                     |

\* Average cell dry weight = 456.3 pg/cell

\*\* Sum of light and heavy chains ribosomal footprints

400

401

### 402 **3.5 CHO cells have suppressed expression of expensive proteins in their secretome**

403 In any cell, the secretory machinery is concurrently processing thousands of secreted and membrane  
404 proteins, which all compete for secretory pathway resources and pose a metabolic burden. To quantify  
405 this burden, we estimated the energetic cost of synthesizing and secreting all 5,641 endogenous  
406 proteins in the CHO secretome and membrane proteome in terms of total number of ATP equivalent  
407 molecules consumed. These protein costs were compared to the cost of the eight recombinant proteins  
408 previously analyzed. To refine estimates, we experimentally measured the number of N-linked glycans in  
409 the CHO proteome and integrated published numbers of O-linked glycans in CHO proteomic data<sup>9</sup>.  
410 Across the CHO secretome, protein synthesis cost varies substantially, and recombinant products are on  
411 average more expensive (Fig. 5A). For example, F8 is a “difficult-to-express” protein in CHO cells due to  
412 its propensity to aggregate in the ER, which promotes its premature degradation<sup>29,30</sup>. Our analysis  
413 further highlights that each molecule of F8 requires an excessive amount of ATP for its production (9488  
414 ATP molecules). This imposes a significant burden to the secretory machinery of CHO cells, which  
415 typically expresses much less expensive proteins. With the broad range of biosynthetic costs for  
416 different proteins, we wondered if gene expression in CHO cells has been influenced by the ATP cost of  
417 secreted proteins, by suppressing host cell protein expression to more efficiently allocate nutrients.  
418 Unless specific proteins are essential, CHO cells may preferentially suppress energetically expensive  
419 proteins. To test this, we analyzed ribosomal profiling (Ribo-seq) data from a mAb-producing CHO cell  
420 line<sup>19</sup> and compared translation of each transcript against the ATP cost of the associated secreted  
421 protein (see Methods). Indeed, there was a significant negative correlation of -0.43 and -0.36 (Spearman

422  $R_s$ ,  $p$  value  $< 1 \times 10^{-20}$ ) between ribosomal occupancy and ATP cost during early and late phases of culture,  
423 respectively (Fig. 5B). Wondering if the reduced translation was regulated transcriptionally, we further  
424 analyzed RNA-seq data from the same mAb-producing cell line and from another, non-producing CHO-  
425 K1 cell line<sup>31</sup>. The RNA expression also negatively correlated with ATP cost (see Supp. Figure 2). Finally,  
426 we analyzed RNA-seq data from human tissues and immortalized cell lines in the Human Protein Atlas  
427 (HPA)<sup>1</sup>. All RNA-seq datasets in the HPA samples also negatively correlated with ATP cost (Supp. Figure  
428 3). Interestingly, we found that highly secretory tissues such as liver, pancreas and salivary gland had the  
429 strongest correlations, although none as strong as that of the mAb-producing CHO cells (Supp. Figure  
430 3a). Feizi and colleagues recently found that these tissues fine-tune the expression of protein disulfide  
431 isomerase genes<sup>32</sup>, suggesting that a similar regulatory process may take place in the ER of CHO cells as  
432 the secreted mAb contains a relatively high number (17) of disulfide bonds. In conclusion, there is a  
433 clear preference in CHO cells to suppress the expression and translation of proteins that are costly to  
434 synthesize, fold, and secrete.

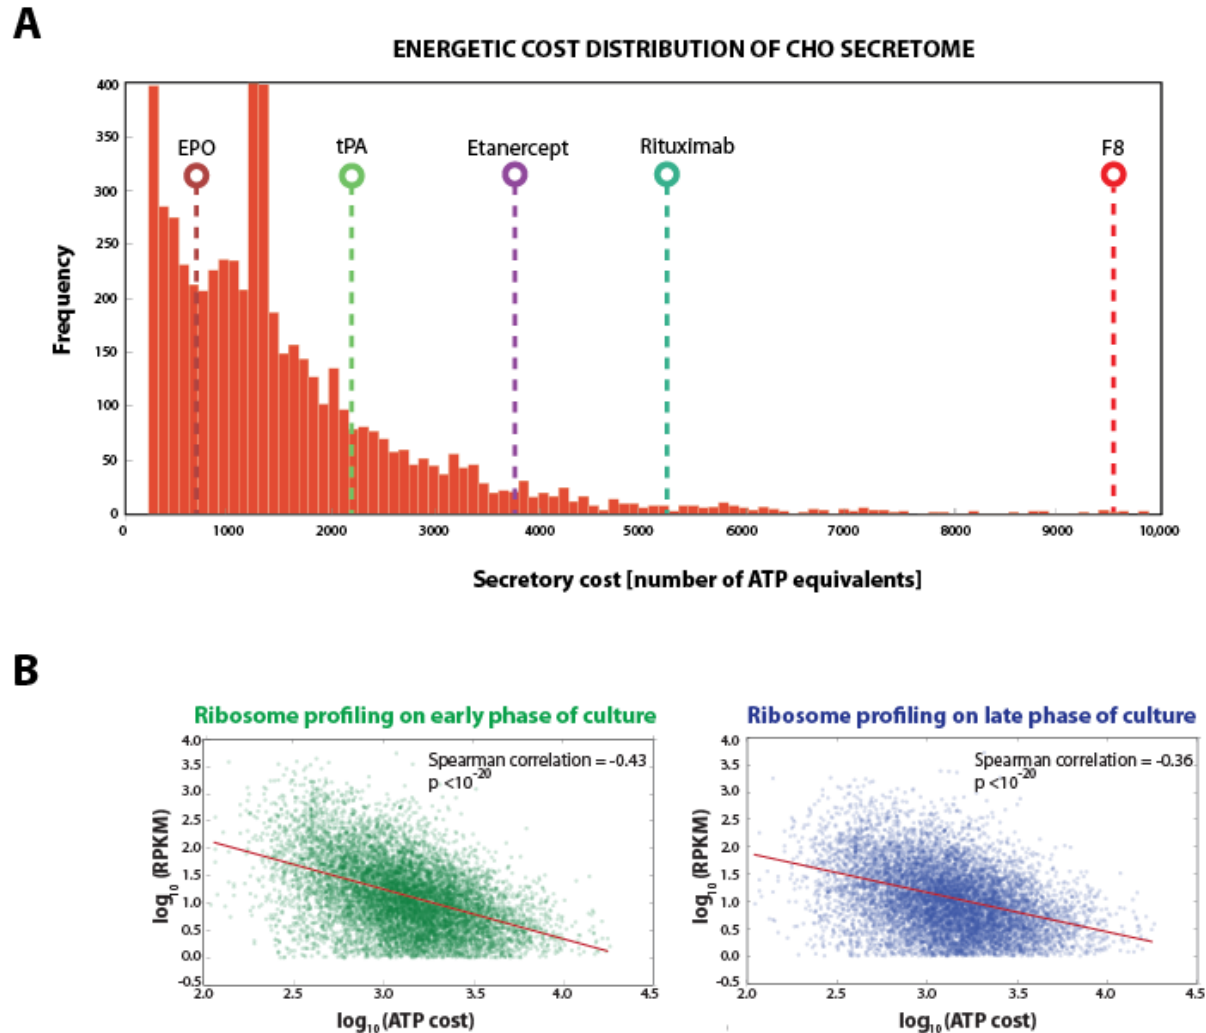

435

436 **Figure 5 – CHO cells preferentially suppress more expensive proteins. (A)** The bioenergetic cost of each

437 secreted CHO protein was computed. 28 of the 5641 proteins in CHO secretome had a cost > 10,000 ATP

438 equivalents and were therefore not included in the histogram for the sake of ease of visualization (these

439 28 proteins are listed in Supp. Notebook 3). The biosynthetic costs of 5 representative biotherapeutics

440 are shown for comparison purposes (see Table 1). **(B)** Scatter plots and Spearman correlation of gene

441 expression and protein cost (in number of ATP per protein) from Kallehauge et al.<sup>19</sup> during early (left)

442 and late (right) phases of culture. RPKM = reads per kilobase of transcript per million.

443

#### 444 **4. Discussion**

445 Mammalian cells synthesize and process thousands of proteins through their secretory pathway. Many

446 of these proteins, including hormones, enzymes, and receptors, are essential for mediating mammalian

447 cell interactions with their environment. Therefore, many have therapeutic importance either as drugs

448 or as targets. The expression and secretion of recombinant proteins represents a significant anabolic  
449 demand that drains several substrates from cellular metabolism (e.g., amino acids, sugar nucleotides,  
450 ATP)<sup>33,34</sup>. Furthermore, the recombinant proteins demand adequate expression of proteins involved in  
451 their transcription, translation, folding, modification, and secretion. Thus, there has been an increasing  
452 interest in engineering the mammalian secretory pathway to boost protein production<sup>35–38</sup>. Despite  
453 important advances in the field<sup>24</sup>, current strategies to engineer the secretory pathway have remained  
454 predominantly empirical<sup>39,40</sup>. Recent modeling approaches, however, have enabled the analysis of the  
455 metabolic capabilities of important eukaryotic cells (including CHO) under different genetic and  
456 environmental conditions<sup>23,41–43</sup>. With the development of genome-scale models of protein-producing  
457 cells, such as the genome-scale model of CHO cell metabolism<sup>23</sup>, it is now possible to gain a systems-  
458 level understanding of the CHO phenotype<sup>44</sup>.

459  
460 Efforts have been underway to enumerate the machinery needed for protein production. For example,  
461 Lund and colleagues<sup>45</sup> recently reconstructed the most comprehensive network of the mouse secretory  
462 pathway to date. By comparing the mouse and CHO-K1 genomes and mapping CHO gene expression  
463 data onto this network, the authors identified potential targets for CHO cell engineering, demonstrating  
464 the great potential of systems biology to interrogate and understand protein secretion in animal cells.  
465 This network reconstruction, although useful for contextualizing omics data (e.g., RNA-seq), is not set up  
466 for simulations of protein production, nor integrated with additional cellular processes such as  
467 metabolism. Therefore, to quantify the cost and cellular capacity for protein production, it is important  
468 to delineate the mechanisms of all biosynthetic steps and bioenergetic processes in the cell.

469  
470 Here we have presented the first genome-scale reconstruction of the secretory pathway in mammalian  
471 cells. We connected this to current metabolic networks, yielding models of protein secretion and  
472 metabolism for human, mouse and CHO cells. These models compile decades of research in  
473 biochemistry and cell biology of higher eukaryotes and present it in a mathematical model. Using our  
474 model, we quantitatively estimated the energetic cost of producing several therapeutic proteins and all  
475 proteins in the CHO cell and human secretomes. We also identified factors limiting the secretion of  
476 individual products and observed that these depend on both the complexity of the product and the  
477 composition of the culture media. Furthermore, by integrating ribosomal profiling data with our model  
478 we found that CHO cells have selectively suppressed the expression of energetically expensive secreted

479 proteins. Expanding upon this observation, we demonstrated that specific productivities can be  
480 predictably increased following the knock-down of an energetically expensive, non-essential protein.

481  
482 It is important to note that while our models capture major features of secreted proteins, there are  
483 additional PTMs (e.g., phosphorylation, gamma carboxylation), pathway machinery (e.g., chaperones),  
484 and cell processes that could possibly be captured in further expansions of the modeling framework<sup>45</sup>  
485 (e.g, the unfolded protein response). These could be included as energetic costs associated with building  
486 and maintaining the secretory machinery (chaperones<sup>3</sup>, glycosyltransferases<sup>46</sup>); protein stability and  
487 turnover rates<sup>47</sup>; solubility constraints<sup>48</sup> and molecular crowding effects<sup>49</sup>. As these are captured by the  
488 models in a protein product-specific manner, predictions of protein production capacity will improve,  
489 and the models could provide further insights for cell engineering for biotechnology or to obtain a  
490 deeper understanding of mechanisms underlying amyloid diseases. Finally, a simplification of our  
491 secretory model is that it only computes the bioenergetic cost of synthesizing and attaching single  
492 representative N- and O-linked glycans to secreted proteins (i.e., it does not include the  
493 microheterogeneity and diversity of glycan structures of different proteins). Thus, an immediate  
494 potential expansion of our secretory model would involve coupling it to existing computational models  
495 of protein glycosylation (recently reviewed by Spahn and Lewis<sup>50</sup>). For example, given an N-glycan  
496 reaction network that captures the glycoform complexity of a target protein<sup>51</sup>, one could build secretory  
497 reactions for the specific glycoforms of interest and compute the metabolic demands associated with  
498 each of them as to identify potential targets and nutrient supplementations for glycoengineering.

499  
500 In conclusion, the results of our study have important implications regarding the ability to predict  
501 protein expression based on protein specific attributes and energetic requirements. The secretory  
502 pathway models here stand as novel tools to study mammalian cells and the energetic trade-off  
503 between growth and protein secretion in a product- and cell-specific manner. We presented algorithms  
504 that provide novel insights with our models, and expect that many other methods can be developed to  
505 answer a wide array of questions surrounding the secretory pathway, as seen for metabolism<sup>52</sup>. To  
506 facilitate further use of these models, we provide our code and detailed instructions on how to  
507 construct protein-specific models in the Supp. Jupyter Notebooks available at  
508 <https://github.com/LewisLabUCSD>.

509

510 **Acknowledgements**

511 The authors would like to thank Philipp Spahn, Austin Chiang, and Chih-Chung Kuo for their insightful  
512 comments on this manuscript. This work was supported by generous funding from the Novo Nordisk  
513 Foundation provided to the Center for Biosustainability at the Technical University of Denmark  
514 (NNF10CC1016517 and NNF16CC0021858), and from NIGMS (R35 GM119850), and a fellowship from  
515 the Government of Mexico (CONACYT) and the University of California Institute for Mexico and the  
516 United States (UC-MEXUS).

517

## 518 **References**

- 519 1. Uhlén, M. *et al.* Tissue-based map of the human proteome. *Science* (80-. ). **347**, (2015).
- 520 2. Walsh, G. Biopharmaceutical benchmarks 2014. *Nat. Biotechnol.* **32**, 992–1000 (2014).
- 521 3. Feizi, A., Österlund, T., Petranovic, D., Bordel, S. & Nielsen, J. Genome-Scale Modeling of the  
522 Protein Secretory Machinery in Yeast. *PLoS One* **8**, e63284 (2013).
- 523 4. Liu, L., Feizi, A., Österlund, T., Hjort, C. & Nielsen, J. Genome-scale analysis of the high-efficient  
524 protein secretion system of *Aspergillus oryzae*. *BMC Syst. Biol.* **8**, 73 (2014).
- 525 5. Irani, Z. A., Kerkhoven, E. J., Shojaosadati, S. A. & Nielsen, J. Genome-scale metabolic model of  
526 *Pichia pastoris* with native and humanized glycosylation of recombinant proteins. *Biotechnol.*  
527 *Bioeng.* **113**, 961–969 (2016).
- 528 6. Araki, K. & Inaba, K. Structure, mechanism, and evolution of Ero1 family enzymes. *Antioxid.*  
529 *Redox Signal.* **16**, 790–9 (2012).
- 530 7. Hiller, K., Grote, A., Scheer, M., Munch, R. & Jahn, D. PrediSi: prediction of signal peptides and  
531 their cleavage positions. *Nucleic Acids Res.* **32**, W375–W379 (2004).
- 532 8. Fankhauser, N. & Maser, P. Identification of GPI anchor attachment signals by a Kohonen self-  
533 organizing map. *Bioinformatics* **21**, 1846–1852 (2005).
- 534 9. Yang, Z. *et al.* The GalNAc-type O-Glycoproteome of CHO cells characterized by the SimpleCell  
535 strategy. *Mol. Cell. Proteomics* **13**, 3224–35 (2014).
- 536 10. Baycin-Hizal, D. *et al.* Proteomic Analysis of Chinese Hamster Ovary Cells. *J. Proteome Res.* **11**,  
537 5265–5276 (2012).
- 538 11. Orth, J. D., Thiele, I. & Palsson, B. Ø. What is flux balance analysis? *Nat. Biotechnol.* **28**, 245–8  
539 (2010).
- 540 12. Schellenberger, J. *et al.* Quantitative prediction of cellular metabolism with constraint-based  
541 models: the COBRA Toolbox v2.0. *Nat. Protoc.* **6**, 1290–1307 (2011).
- 542 13. Grainger, R. K. & James, D. C. CHO cell line specific prediction and control of recombinant

- 543 monoclonal antibody *N*-glycosylation. *Biotechnol. Bioeng.* **110**, 2970–2983 (2013).
- 544 14. Araki, K. & Nagata, K. Protein Folding and Quality Control in the ER. *Cold Spring Harb. Perspect.*  
545 *Biol.* **3**, a007526–a007526 (2011).
- 546 15. Borner, G. H. H. *et al.* Multivariate proteomic profiling identifies novel accessory proteins of  
547 coated vesicles. *J. Cell Biol.* **197**, 141–160 (2012).
- 548 16. Cheng, Y., Boll, W., Kirchhausen, T., Harrison, S. C. & Walz, T. Cryo-electron Tomography of  
549 Clathrin-coated Vesicles: Structural Implications for Coat Assembly. *J. Mol. Biol.* **365**, 892–899  
550 (2007).
- 551 17. Takamori, S. *et al.* Molecular Anatomy of a Trafficking Organelle. *Cell* **127**, 831–846 (2006).
- 552 18. Liu, J. K. *et al.* Reconstruction and modeling protein translocation and compartmentalization in  
553 *Escherichia coli* at the genome-scale. *BMC Syst. Biol.* **8**, 110 (2014).
- 554 19. Kallehauge, T. B. *et al.* Ribosome profiling-guided depletion of an mRNA increases cell growth  
555 rate and protein secretion. *Sci. Rep.* **7**, 40388 (2017).
- 556 20. Wang, Y., Eddy, J. A. & Price, N. D. Reconstruction of genome-scale metabolic models for 126  
557 human tissues using mCADRE. *BMC Syst. Biol.* **6**, 153 (2012).
- 558 21. Opdam, S. *et al.* A Systematic Evaluation of Methods for Tailoring Genome-Scale Metabolic  
559 Models. *Cell Syst.* **4**, 318–329.e6 (2017).
- 560 22. González-Leal, I. J. *et al.* Use of a Plackett-Burman statistical design to determine the effect of  
561 selected amino acids on monoclonal antibody production in CHO cells. *Biotechnol. Prog.* **27**,  
562 1709–1717 (2011).
- 563 23. Hefzi, H. *et al.* A Consensus Genome-scale Reconstruction of Chinese Hamster Ovary Cell  
564 Metabolism. *Cell Syst.* **3**, 434–443.e8 (2016).
- 565 24. Golabgir, A. *et al.* Quantitative feature extraction from the Chinese hamster ovary bioprocess  
566 bibliome using a novel meta-analysis workflow. *Biotechnol. Adv.* **34**, 621–633 (2016).
- 567 25. Swainston, N. *et al.* Recon 2.2: from reconstruction to model of human metabolism.  
568 *Metabolomics* **12**, 109 (2016).
- 569 26. Sigurdsson, M. I., Jamshidi, N., Steingrímsson, E., Thiele, I. & Palsson, B. Ø. A detailed genome-  
570 wide reconstruction of mouse metabolism based on human Recon 1. *BMC Syst. Biol.* **4**, 140  
571 (2010).
- 572 27. Templeton, N., Dean, J., Reddy, P. & Young, J. D. Peak Antibody Production is Associated With  
573 Increased Oxidative Metabolism in an Industrially Relevant Fed-Batch CHO Cell Culture.  
574 *Biotechnol. Bioeng* **110**, 2013–2024 (2013).



- 575 28. Kim, S. J., Kim, N. S., Ryu, C. J., Hong, H. J. & Lee, G. M. Characterization of chimeric antibody  
576 producing CHO cells in the course of dihydrofolate reductase-mediated gene amplification and  
577 their stability in the absence of selective pressure. *Biotechnol. Bioeng.* **58**, 73–84 (1998).
- 578 29. Kaufman, R. J. *et al.* Effect of von Willebrand Factor Coexpression on the Synthesis and Secretion  
579 of Factor VIII in Chinese Hamster Ovary Cells. *Mol. Cell. Biol.* **9**, 1233–1242 (1989).
- 580 30. Pipe, S. W., Morris, J. A., Shah, J. & Kaufman, R. J. Differential interaction of coagulation factor  
581 VIII and factor V with protein chaperones calnexin and calreticulin. *J. Biol. Chem.* **273**, 8537–44  
582 (1998).
- 583 31. van Wijk, X. M. *et al.* Whole-Genome Sequencing of Invasion-Resistant Cells Identifies Laminin  $\alpha$ 2  
584 as a Host Factor for Bacterial Invasion. *MBio* **8**, e02128-16 (2017).
- 585 32. Feizi, A., Gatto, F., Uhlen, M. & Nielsen, J. Human protein secretory pathway genes are expressed  
586 in a tissue-specific pattern to match processing demands of the secretome. *npj Syst. Biol. Appl.* **3**,  
587 22 (2017).
- 588 33. Gu, M. B., Todd, P. & Kompala, D. S. Metabolic burden in recombinant CHO cells: effect of dhfr  
589 gene amplification and lacZ expression. *Cytotechnology* **18**, 159–166 (1996).
- 590 34. Gu, M. B., Todd, P. & Kompala, D. S. Analysis of foreign protein overproduction in recombinant  
591 CHO cells. Effect of growth kinetics and cell cycle traverse. *Ann. N. Y. Acad. Sci.* **721**, 194–207  
592 (1994).
- 593 35. Hansen, H. G., Pristovšek, N., Kildegaard, H. F. & Lee, G. M. Improving the secretory capacity of  
594 Chinese hamster ovary cells by ectopic expression of effector genes: Lessons learned and future  
595 directions. *Biotechnol. Adv.* **35**, 64–76 (2017).
- 596 36. Delic, M., Göngrich, R., Mattanovich, D. & Gasser, B. Engineering of Protein Folding and  
597 Secretion—Strategies to Overcome Bottlenecks for Efficient Production of Recombinant Proteins.  
598 *Antioxid. Redox Signal.* **21**, 414–437 (2014).
- 599 37. Le Fourn, V., Girod, P.-A., Buceta, M., Regamey, A. & Mermod, N. CHO cell engineering to prevent  
600 polypeptide aggregation and improve therapeutic protein secretion. *Metab. Eng.* **21**, 91–102  
601 (2014).
- 602 38. Kuo, C. C. *et al.* The emerging role of systems biology for engineering protein production in CHO  
603 cells. *Curr. Opin. Biotechnol.* **51**, 64–69 (2018).
- 604 39. Borth, N., Mattanovich, D., Kunert, R. & Katinger, H. Effect of Increased Expression of Protein  
605 Disulfide Isomerase and Heavy Chain Binding Protein on Antibody Secretion in a Recombinant  
606 CHO Cell Line. *Biotechnol. Prog.* **21**, 106–111 (2008).

- 607 40. Ku, S. C. Y., Ng, D. T. W., Yap, M. G. S. & Chao, S.-H. Effects of overexpression of X-box binding  
608 protein 1 on recombinant protein production in Chinese hamster ovary and NS0 myeloma cells.  
609 *Biotechnol. Bioeng.* **99**, 155–164 (2008).
- 610 41. Yusufi, F. N. K. *et al.* Mammalian Systems Biotechnology Reveals Global Cellular Adaptations in a  
611 Recombinant CHO Cell Line. *Cell Syst.* **4**, 530–542.e6 (2017).
- 612 42. Selvarasu, S. *et al.* Combined in silico modeling and metabolomics analysis to characterize fed-  
613 batch CHO cell culture. *Biotechnol. Bioeng.* **109**, 1415–1429 (2012).
- 614 43. Gutierrez, J. M. & Lewis, N. E. Optimizing eukaryotic cell hosts for protein production through  
615 systems biotechnology and genome-scale modeling. *Biotechnol. J.* **10**, 939–49 (2015).
- 616 44. Galleguillos, S. N. *et al.* What can mathematical modelling say about CHO metabolism and  
617 protein glycosylation? *Comput. Struct. Biotechnol. J.* **15**, 212–221 (2017).
- 618 45. Lund, A. M. *et al.* Network reconstruction of the mouse secretory pathway applied on CHO cell  
619 transcriptome data. *BMC Syst. Biol.* **11**, 37 (2017).
- 620 46. Jimenez Del Val, I., Polizzi, K. M. & Kontoravdi, C. A theoretical estimate for nucleotide sugar  
621 demand towards Chinese Hamster Ovary cellular glycosylation. *Sci. Rep.* **6**, (2016).
- 622 47. O’Brien, E. J., Lerman, J. A., Chang, R. L., Hyduke, D. R. & Palsson, B. O. Genome-scale models of  
623 metabolism and gene expression extend and refine growth phenotype prediction. *Mol. Syst. Biol.*  
624 **9**, 693–693 (2014).
- 625 48. Vazquez, A. & Oltvai, Z. N. Macromolecular crowding explains overflow metabolism in cells. *Sci.*  
626 *Rep.* **6**, (2016).
- 627 49. Beg, Q. K. *et al.* Intracellular crowding defines the mode and sequence of substrate uptake by  
628 *Escherichia coli* and constrains its metabolic activity. *Proc. Natl. Acad. Sci. U. S. A.* **104**, 12663–8  
629 (2007).
- 630 50. Spahn, P. N. & Lewis, N. E. Systems glycobiology for glycoengineering. *Curr. Opin. Biotechnol.*  
631 **30C**, 218–224 (2014).
- 632 51. Spahn, P. N. *et al.* A Markov chain model for N-linked protein glycosylation - towards a low-  
633 parameter tool for model-driven glycoengineering. *Metab. Eng.* **33**, 52–66 (2016).
- 634 52. Lewis, N. E., Nagarajan, H. & Palsson, B. O. Constraining the metabolic genotype-phenotype  
635 relationship using a phylogeny of in silico methods. *Nat. Rev. Microbiol.* **10**, 291–305 (2012).
- 636 53. Martínez, V. S., Buchsteiner, M., Gray, P., Nielsen, L. K. & Quek, L.-E. Dynamic metabolic flux  
637 analysis using B-splines to study the effects of temperature shift on CHO cell metabolism. *Metab.*  
638 *Eng. Commun.* **2**, 46–57 (2015).

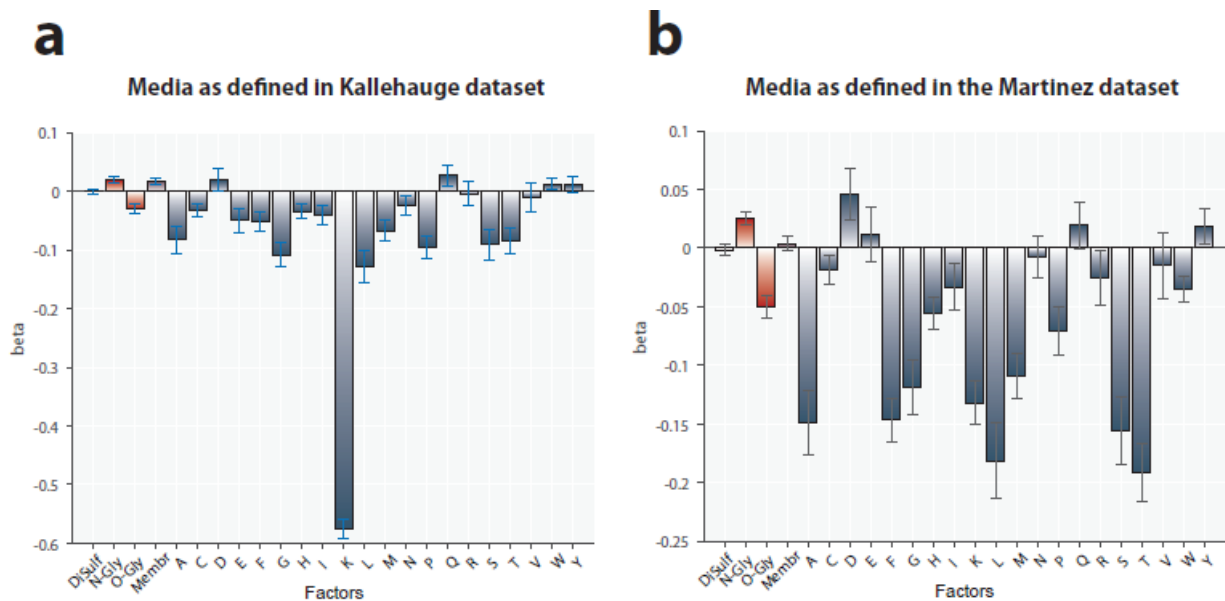

639  
 640 **Supp. Figure 1 - Factors affecting iCHO2048s-predicted productivity with two different**  
 641 **compositions.** The specific consumption rates are listed in Supp. File 3 as Kallehauge<sup>19</sup> (left panel) and  
 642 Martinez<sup>53</sup> (right panel).  
 643

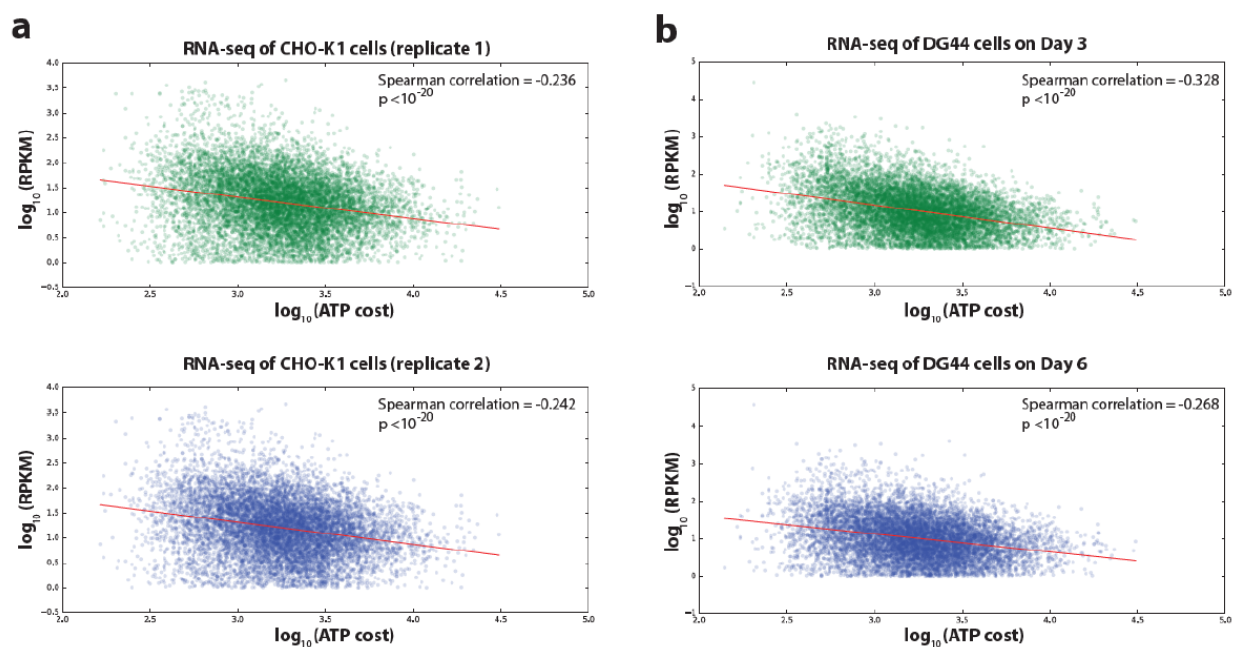

644  
 645 **Supp. Figure 2 – Spearman correlation between ATP cost and gene expression levels in non-producing**  
 646 **CHO-K1 and CHO-DG44 mAb-producing cells.** Gene transcription levels from **(a)** van Wijk et al.<sup>31</sup> and **(b)**  
 647 Kallehauge et al.<sup>19</sup> were compared against the ATP cost of producing the translated proteins.  
 648

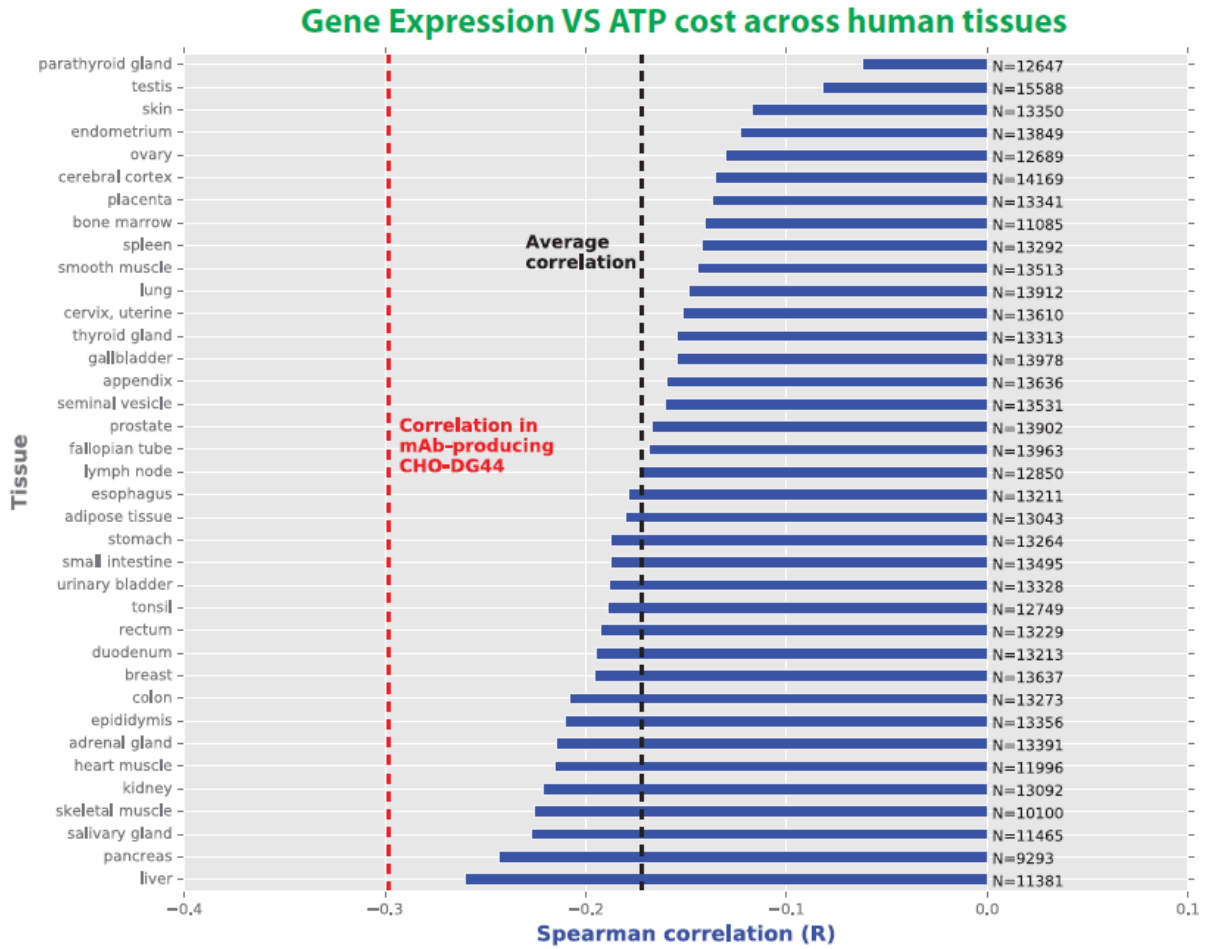

649

650 **Supp. Figure 3 – Spearman correlations between ATP cost and gene expression levels across human**

651 **tissues.** Gene transcription levels from the Human Protein Atlas<sup>1</sup>were analyzed against the ATP cost of

652 producing the translated proteins. The average of all Spearman correlations across samples is indicated

653 by the black dashed line while the red dashed line indicates the correlation found using RNA-seq data in

654 Kallehauge et al<sup>19</sup>. The number of genes used to compute the correlations in each sample is indicated

655 next to the bars. All p-values associated to each correlation are less than  $1 \times 10^{-20}$

656

657
